# Supplementary material
Source: PubMed Central journal article supplement (PMC11470328)
Supplement: ajtr0016-4751-f5.pdf [file ajtr0016-4751-f5.pdf]

## Running title

**Supplementary Table 1.** Preoperative LVEF and APACHE II scores of the two groups

|                          | Delirium group (n = 49) | Non-delirium group (n = 165) | $\chi^2$ | P value |
|--------------------------|-------------------------|------------------------------|----------|---------|
| LVEF (%)                 | 51.87±4.61              | 56.02±3.61                   | 6.615    | <0.0001 |
| APACHE II score (points) | 12.52±3.38              | 10.75±4.20                   | 2.697    | 0.0076  |

Notes: LVEF: Left Ventricular Ejection Fraction; APACHE II: Acute Physiology and Chronic Health Evaluation II.

**Supplementary Table 2.** Surgical parameters of the two groups

|                                              | Delirium group (n = 49) | Non-delirium group (n = 165) | $\chi^2$ | P value |
|----------------------------------------------|-------------------------|------------------------------|----------|---------|
| Anesthesia duration (h)                      | 5.54±0.60               | 5.41±0.83                    | 1.059    | 0.2908  |
| Surgery duration (h)                         | 4.66±0.52               | 4.56±0.61                    | 1.062    | 0.2895  |
| Aortic cross-clamp time (min)                | 142.74±16.70            | 139.06±18.26                 | 1.264    | 0.2077  |
| Intraoperative mean arterial pressure (mmHg) | 59.09±13.22             | 57.44±12.67                  | 0.7943   | 0.4279  |
| Intraoperative blood loss (mL)               | 268.39±54.75            | 273.77±56.73                 | 0.5880   | 0.5572  |

**Supplementary Table 3.** Postoperative surgical parameters of the two groups

|                                               | Delirium group (n = 49) | Non-delirium group (n = 165) | $\chi^2$ | P value |
|-----------------------------------------------|-------------------------|------------------------------|----------|---------|
| Length of ICU stay                            | 4.47±2.30               | 2.09±0.86                    | 11.03    | <0.0001 |
| Postoperative mechanical ventilation duration | 16.01±4.98              | 10.62±3.80                   | 8.075    | <0.0001 |
| Postoperative mean arterial pressure (mmHg)   | 62.70±13.05             | 60.07±13.65                  | 1.196    | 0.2332  |

Note: ICU: intensive care unit.
